# Supplementary material for: The chain order of binary unsaturated lipid bilayers modulated by aromatic-residue-containing peptides: an ATR-FTIR spectroscopy study
Source: Royal Society of Chemistry journal article supplement (doi:10.1039/c7ra01145h), 2017-01-01
Supplement: c7ra01145h1.pdf [file c7ra01145h1.pdf]

## Supplementary Information

### **The chains order of binary unsaturated lipid bilayers modulated by aromatic residues containing peptides: an ATR-FTIR spectroscopy study**

Bo Peng,<sup>a</sup> Xiao-Yan Ding,<sup>a</sup> Chao Sun,<sup>a</sup> Ya-Nan Yang,<sup>a</sup> Yu-Jiao Gao,<sup>a</sup> and Xin Zhao\*<sup>a</sup>

<sup>a</sup>Shanghai Key Laboratory of Magnetic Resonance, Department of Physics, School of Physics and Materials Science, East China Normal University, Shanghai 200062, P. R. China.

### Polarised ATR-FTIR data analysis

The electric fields of incident light for the ATR experiment were computed using the following formulae<sup>1</sup>.

$$E_x = \frac{2\cos\vartheta\sqrt{\sin^2\vartheta - n_{21}^2}}{\sqrt{(1 - n_{21}^2)[(1 + n_{21}^2)\sin^2\vartheta - n_{21}^2]}}$$

$$E_y = \frac{2\cos\vartheta}{\sqrt{(1 - n_{21}^2)}}$$

$$E_z = \frac{2\sin\vartheta\cos\vartheta}{\sqrt{(1 - n_{21}^2)[(1 + n_{21}^2)\sin^2\vartheta - n_{21}^2]}}$$

where  $\vartheta$  is the angle of a light beam to the prism normal at the point of reflection and  $n_{21} = n_2/n_1$  ( $n_1$  is the refractive index of ZnSe, and  $n_2$  is the refractive index of the membrane sample). In our experiments,  $\vartheta$  was equal to  $45^\circ$ . When  $n_1$  was taken to be 2.4 and  $n_2$  was taken to be 1.5,<sup>2</sup>  $E_x$ ,  $E_y$  and  $E_z$  were 1.09, 1.81 and 2.32, respectively.

The  $R^{ATR}$  is the ratio between the absorption of light polarised parallel and perpendicular to the surface of the internal reflection element and is defined by the following formula. The electric field components together with the  $R^{ATR}$  are used to calculate the orientation order parameter  $f$ .

$$R^{ATR} = \frac{A_{\parallel}}{A_{\perp}} = \frac{E_x^2}{E_y^2} + \frac{\frac{E_z^2}{E_y^2}(f\cos^2\alpha + \frac{1-f}{3})}{\frac{f\sin^2\alpha + \frac{1-f}{3}}{2}}$$

where  $R^{ATR}$  is the dichroic ratio,  $A_{\parallel}$  is the parallel polarised incident light,  $A_{\perp}$  is the perpendicularly polarised incident light and  $\alpha$  is the angle between the transition moment of the  $\nu_{as}$  ( $\text{CH}_2$ ) ( $\sim 2920 \text{ cm}^{-1}$ ) and the helix axis. Lipid order parameters were computed from the symmetric ( $\sim 2850 \text{ cm}^{-1}$ ) and asymmetric ( $\sim 2920 \text{ cm}^{-1}$ ) stretching mode of the lipid with  $\alpha$  set as  $90^\circ$ <sup>2</sup>. The value of  $f$  is known; therefore, the average angle of lipid chains relative to the membrane normal  $\gamma$  can be calculated as follows:

$$f = \frac{3\cos^2\gamma - 1}{2}$$

---

### Orientation Analysis from Polarised ATR-FTIR data

The order parameter (S) of helical peptide was computed using the following formulae<sup>3-7</sup>.

$$S = \frac{\left[ \frac{(E_x^2 - R^{ATR} E_y^2 + E_z^2)}{(E_x^2 - R^{ATR} E_y^2 - 2E_z^2)} \right]}{\left[ (3\cos^2\alpha - 1) / 2 \right]}$$

where  $E_x$ ,  $E_y$  and  $E_z$  were the integrated absorption coefficients. If the film refractive index was independent of the wavelength,  $E_x$ ,  $E_y$  and  $E_z$  were 1.398, 1.516 and 1.625<sup>3</sup>, respectively, the above equation can be written as below:

$$S = \frac{\left[ (R^{ATR} - 2) / (R^{ATR} + 1.45) \right]}{\left[ (3\cos^2\alpha - 1) / 2 \right]}$$

where  $\alpha$  was the angle between the principal transition moment and the molecular director.

For the amide I mode,  $\alpha$  was 39°<sup>4</sup>. The tilt angle  $\beta$  from the normal can be calculated as follows:

$$S = (3\cos^2\beta - 1) / 2$$

#### References:

- 1 R. Ishiguro, N. Kimura and S. Takahashi, *Biochemistry*, 1993, **32**, 9792-9797.
- 2 M. Pritsker, J. Rucker, T. L. Hoffman, R. W. Doms and Y. Shai, *Biochemistry*, 1999, **38**, 11359-11371.
- 3 A. Menikh, M. T. Saleh, J. Gariépy and J. M. Boggs, *Biochemistry*, 1997, **36**, 15865-15872.
- 4 I. T. Arkin, W. P. Russ, M. Lebendiker and S. Schuldiner, *Biochemistry*, 1996, **35**, 7233-7238.
- 5 S. O. Smith, R. Jonas, M. Braiman and B. J. Bormann, *Biochemistry*, 1994, **33**, 6334-6341.
- 6 L. K. Tamm and S. A. Tatulian, *Biochemistry*, 1993, **32**, 7720-7726.
- 7 F.-X. Ding, H. Xie, B. Arshava, J. M. Becker and F. Naider, *Biochemistry*, 2001, **40**, 8945-8954.
